# Supplementary material
Source: PubMed Central journal article supplement (PMC3067412)
Supplement: supp_77_7_2232__1.pdf [file supp_77_7_2232__1.pdf]

Supplementary Material

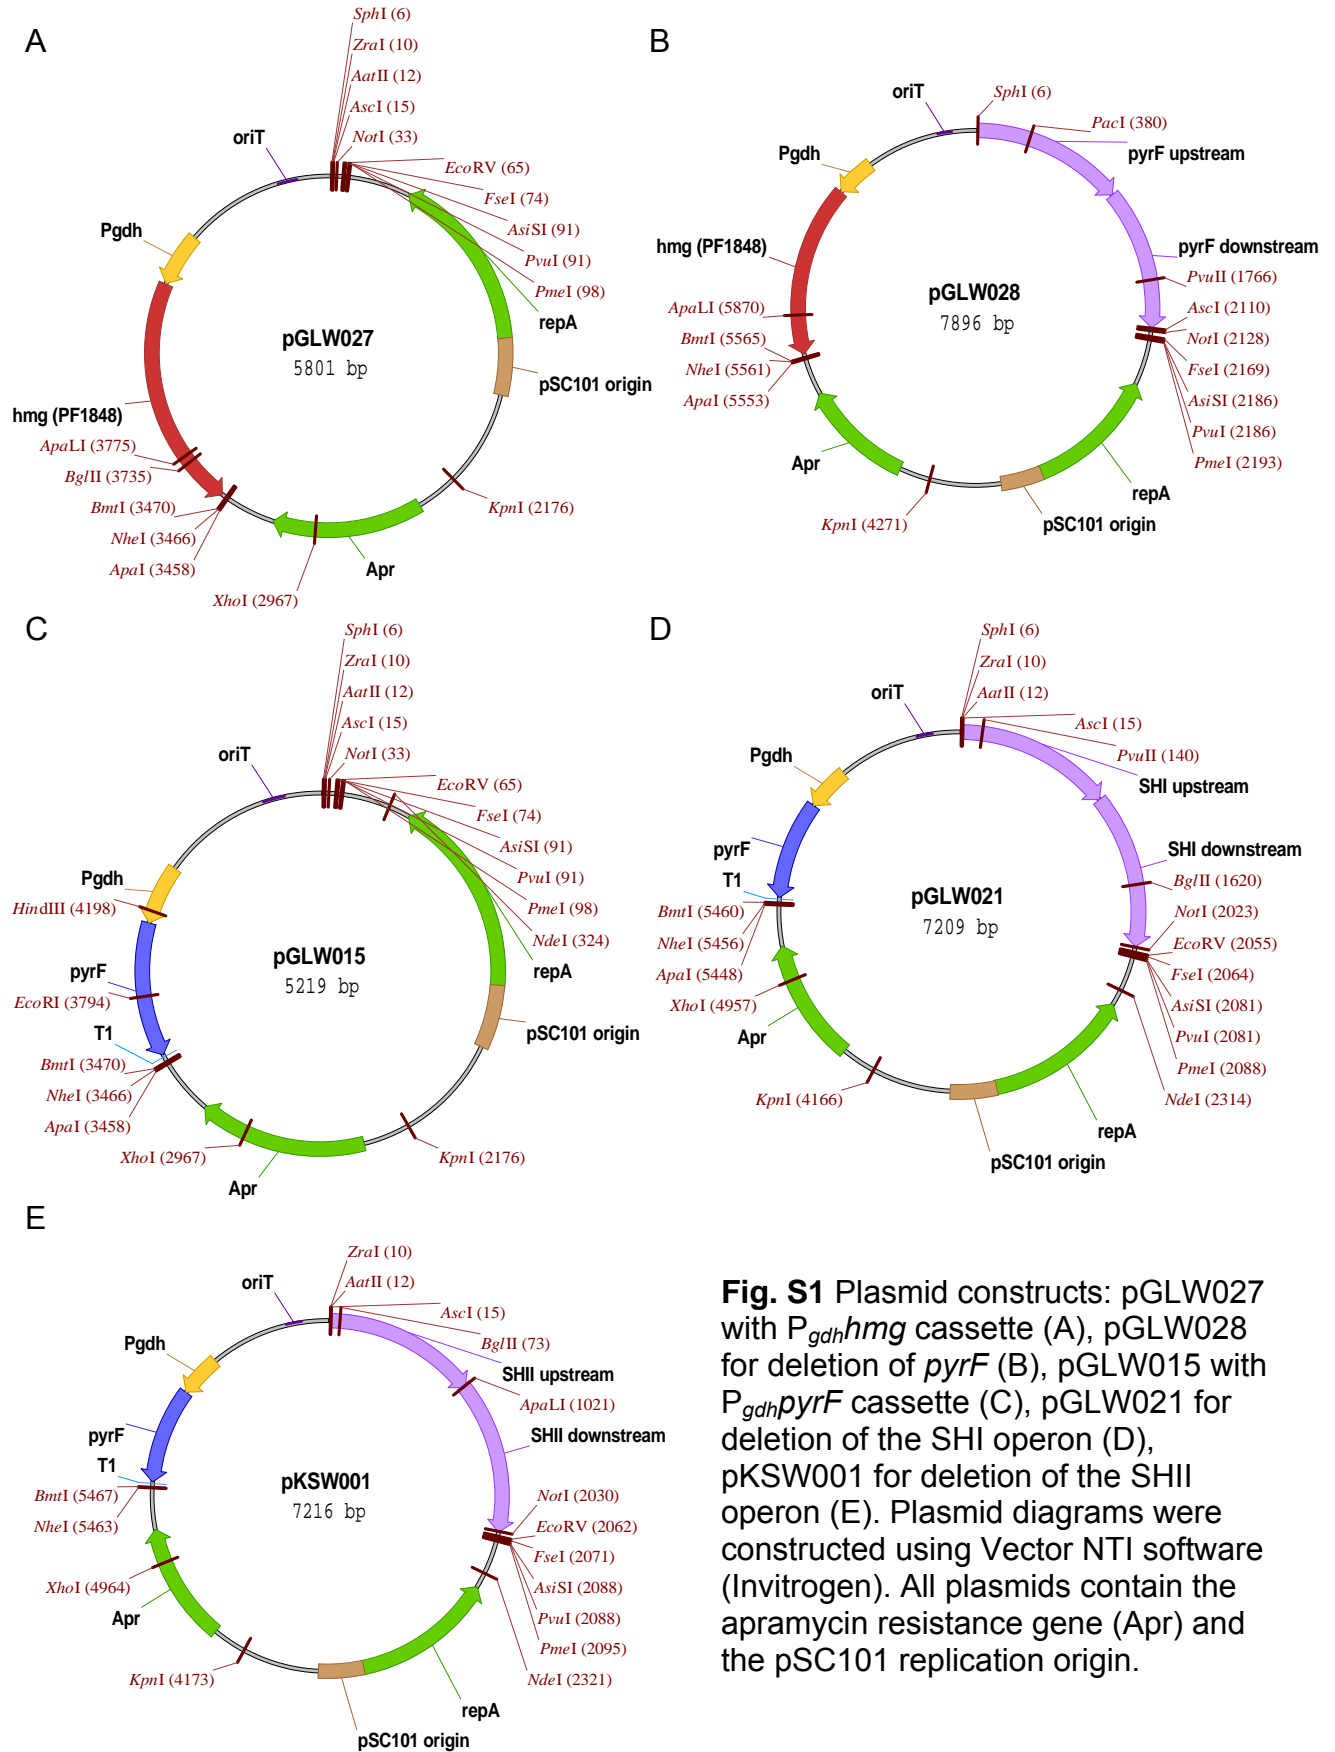

**Fig. S1** Plasmid constructs: pGLW027 with *P<sub>gdh</sub>hmg* cassette (A), pGLW028 for deletion of *pyrF* (B), pGLW015 with *P<sub>gdh</sub>pyrF* cassette (C), pGLW021 for deletion of the SHI operon (D), pKSW001 for deletion of the SHII operon (E). Plasmid diagrams were constructed using Vector NTI software (Invitrogen). All plasmids contain the apramycin resistance gene (*Apr*) and the pSC101 replication origin.

Supplementary Material

A

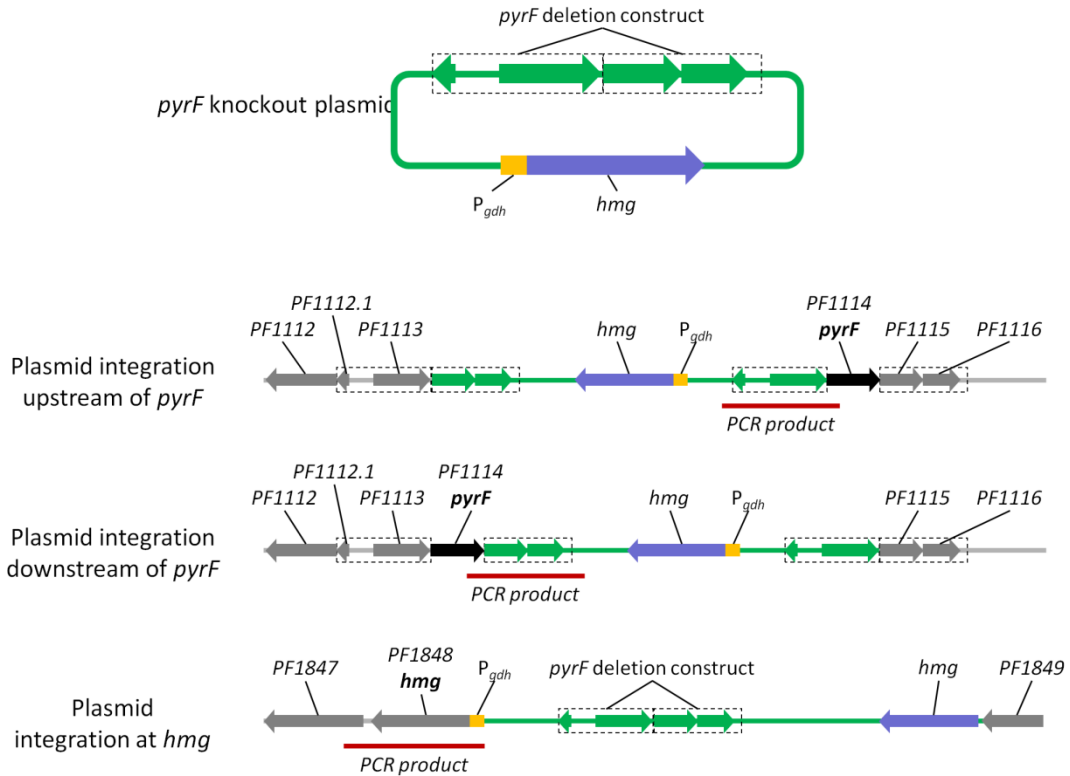

B

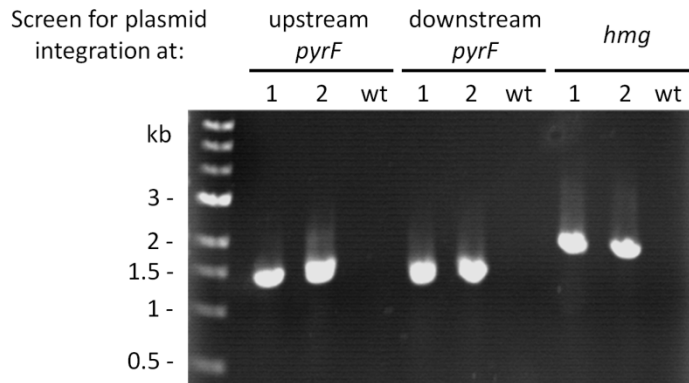

**Fig. S2** Simvastatin resistant isolates 1 and 2 contain plasmid integration at three locations. A. Diagrams of plasmid integration at homologous region upstream of *pyrF*, (top) downstream of *pyrF* (middle), and at *hmg* (bottom). The PCR products used to verify integration events are shown with a bold red line. B. Gel showing PCR products indicated in A for simvastatin isolates 1 and 2 compared to wild type, demonstrating plasmid integration upstream of *pyrF*, downstream of *pyrF*, and at *hmg*. A PCR product can only be obtained in the event of an integration since primer pairs used contain one primer inside the plasmid and one primer within the genome and not in the plasmid.

Supplementary Material

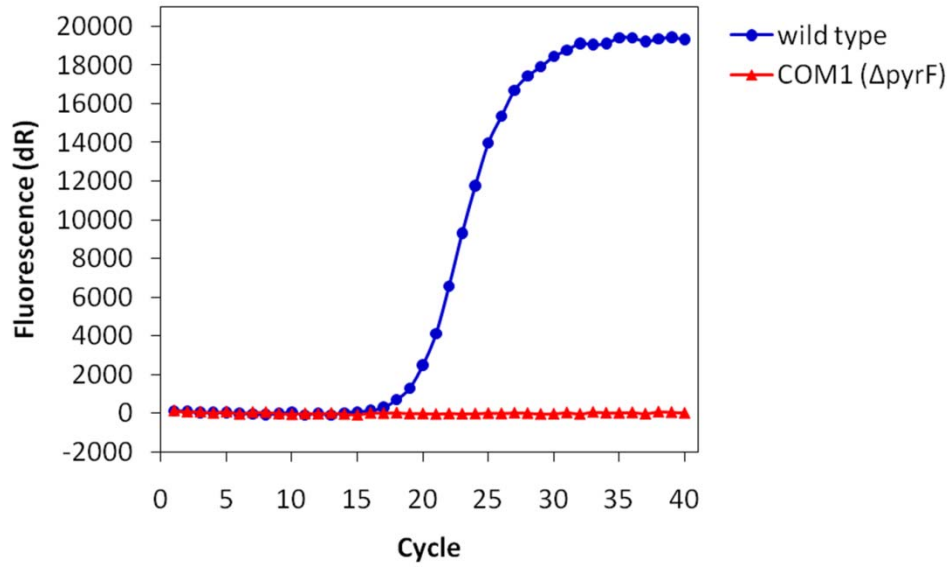

**Fig. S3** Amplification plots from quantitative reverse transcription PCR (RT-qPCR) with primers specific to the *pyrF* gene, amplified from cDNA generated from RNA extracted from cultures of wild type and COM1.

Supplementary Material

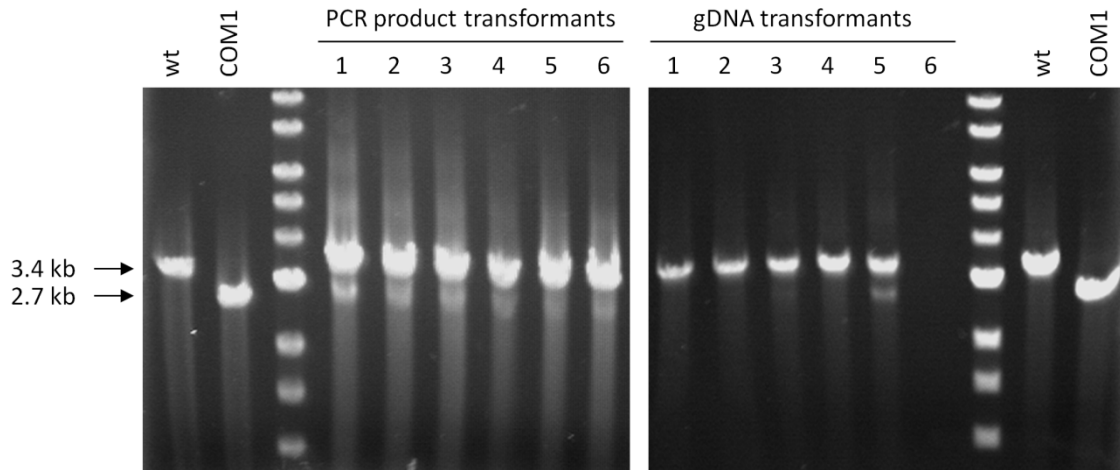

**Fig. S4** PCR screen of transformants obtained using either a PCR product of the wild type *pyrF* region (left panel) or intact genomic DNA (gDNA) containing the wild type *pyrF* allele (right panel). Genomic DNA from the wild type (wt) and COM1 strains were included as controls. PCR was performed with primers targeting the region of the *pyrF* locus. All transformants have the *pyrF* locus restored to wild type (3.4 kb), and some still contain mixtures with the *pyrF* deletion (2.7 kb).

Supplementary Material

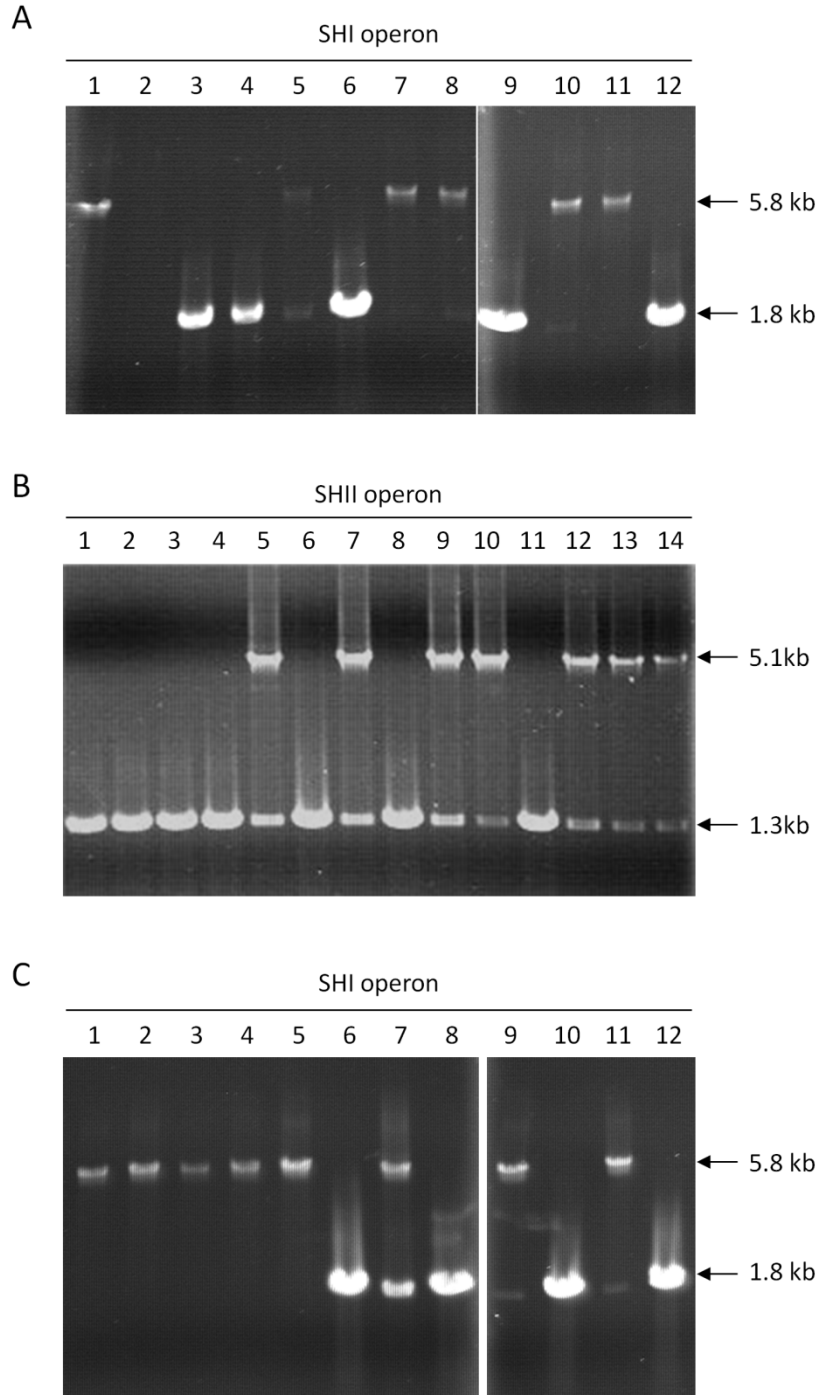

**Fig. S5** PCR screen for SHI and SHII operon deletions. PCR products of SHI or SHII operon genome region in isolates screened to find deletions of the SHI operon in the COM1 strain (A), the SHII operon in the COM1 strain (B), the SHI operon in the  $\Delta$ SHII strain (C). PCR was performed with primer sets in which at least one primer in the set was outside the homologous regions on the transforming plasmid DNA.

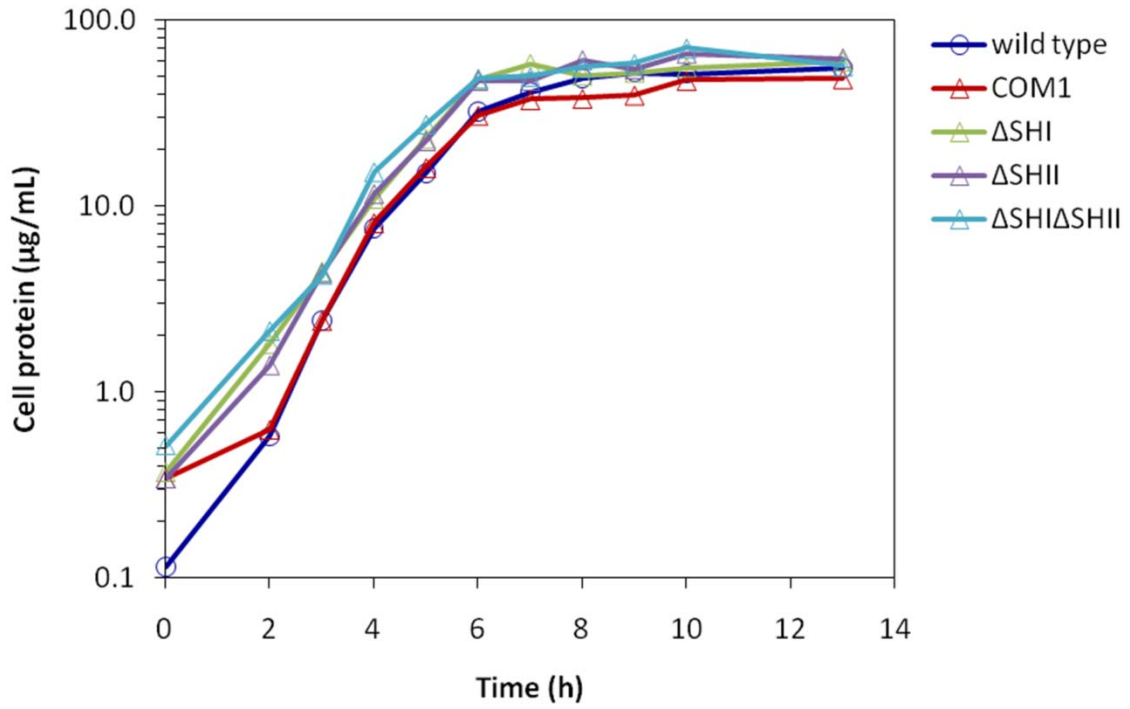

**Fig. S6** Growth of  $\Delta$ SHI,  $\Delta$ SHII, and  $\Delta$ SHI $\Delta$ SHII mutants compared to COM1 and wild type strains on YEM complex medium. Uracil was added to the medium at a concentration of 20  $\mu$ M.

**Table S1.** Primers used in the study.

| Primer sequence (5'-3') <sup>a</sup>                            | Purpose                                                                                                               |
|-----------------------------------------------------------------|-----------------------------------------------------------------------------------------------------------------------|
| <i>pyrF</i> knockout vector and deletion confirmation           |                                                                                                                       |
| <i>agagagagggcatgccacctacctcctata</i><br><i>ttgttccatg</i>      | primer for <i>pyrF</i> ~1-kb upstream flanking region, with SphI site plus 8 extra bases                              |
| <i>ttgagctcattcagccacctccaatatttc</i><br><i>c</i>               | primer for <i>pyrF</i> ~1-kb upstream flanking region, with overlap to 5' end of 1-kb downstream flanking region      |
| <i>agggtggctgaatggagctcaagataaag</i><br><i>cacc</i>             | primer for <i>pyrF</i> ~1-kb downstream flanking region, with overlap to 3' end of 1-kb upstream flanking region      |
| <i>agagagagggcgcgccgcaagaggat</i><br><i>gattaggtagagc</i>       | primer for <i>pyrF</i> ~1-kb downstream flanking region, with AscI site plus 8 extra bases                            |
| <i>ctcaactgtgatgtttgtcttgc</i>                                  | confirmation/sequencing primer for <i>pyrF</i> deletion                                                               |
| <i>cgttggcaacaacttctctg</i>                                     | confirmation/sequencing primer for <i>pyrF</i> deletion                                                               |
| <i>gaaataactccaagaccacttcc</i>                                  | confirmation primer for plasmid insertion at <i>pyrF</i> genome region                                                |
| <i>gaaagctggagcagattacatc</i>                                   | confirmation primer for plasmid insertion at <i>pyrF</i> genome region                                                |
| Vector primers                                                  |                                                                                                                       |
| <i>ccaaggaaagtctacacgaacc</i>                                   | primer upstream from MCS on pJHW008 derivative vectors                                                                |
| <i>ctgagacaactgttacagcttc</i>                                   | primer downstream from MCS on pJHW008 derivative vectors                                                              |
| <i>hmg</i> genome region                                        |                                                                                                                       |
| <i>cattccatctccaatgaactttgc</i>                                 | confirmation/sequencing primer for plasmid insertion at <i>hmg</i>                                                    |
| <i>tgctcaacaaggttagagaagc</i>                                   | confirmation/sequencing primer for plasmid insertion at <i>hmg</i>                                                    |
| <i>gaacaaatggaacgtcttcacc</i>                                   | confirmation/sequencing primer for plasmid insertion at <i>hmg</i>                                                    |
| <i>gacgtgtggaggatctcaag</i>                                     | confirmation/sequencing primer for plasmid insertion at <i>hmg</i>                                                    |
| <i>P<sub>gdh</sub>pyrF</i> cassette                             |                                                                                                                       |
| <i>gattgaaaatggagtgagctgag</i>                                  | primers from 5' end of <i>gdh</i> promoter region                                                                     |
| <i>gttcacctccaataggtg</i>                                       | primers from 3' end of the <i>gdh</i> promoter region                                                                 |
| <i>aatcacctaattggagggatgaacatgat</i><br><i>tgtactagcgttgagc</i> | primers from 5' end of <i>pyrF</i> , with overlap to 3' end of the <i>gdh</i> promoter                                |
| <i>ctaaaaaagattttatcttgagctccattctt</i><br><i>cacc</i>          | primers from 3' end of <i>pyrF</i> , with putative termination sequence T1 from <i>hpyA1</i>                          |
| SHI operon knockout vector and deletion confirmation            |                                                                                                                       |
| <i>agagagagggcgcgccctgagatgaag</i><br><i>ctaggagaac</i>         | primer for SHI operon upstream ~1-kb flanking region, with AscI site plus 8 extra bp                                  |
| <i>caacaaaaatagataaaaaggattaaa</i><br><i>caaaccacctccaatgag</i> | primer for SHI operon upstream ~1-kb flanking region, with overlap to 5' end of SHI downstream 1-kb flanking region   |
| <i>ttaatccttttatctatttgttgag</i>                                | primer for SHI operon downstream ~1-kb flanking region                                                                |
| <i>agagagagggcgccgctagatttctgt</i><br><i>agctctagtac</i>        | primer for SHI operon downstream ~1-kb flanking region, with NotI site plus 8 extra bases                             |
| <i>cagtgaatggctttggaacc</i>                                     | confirmation/sequencing primer for SHI operon deletion                                                                |
| <i>gaaagggagtatttagggacac</i>                                   | confirmation/sequencing primer for SHI operon deletion                                                                |
| <i>agaagagggactcaaggcg</i>                                      | sequencing primer for SHI operon deletion                                                                             |
| SHII operon knock-out vector and deletion confirmation          |                                                                                                                       |
| <i>taaggcgcgccatttagaccatcctccttt</i>                           | primer for SHII operon upstream ~1-kb flanking region, with AscI site plus 8 extra bp                                 |
| <i>acgaagtgcacaactttctcacctccttt</i>                            | primer for SHII operon upstream ~1-kb flanking region, with overlap to 5' end of SHI downstream ~1-kb flanking region |
| <i>agaaaagttgtgcacttcgtaagcttaa</i>                             | primer for SHII operon downstream ~1-kb flanking region with overlap to 3' end of SHI upstream ~1-kb flanking region  |

Supplementary Material

|                                      |                                                                                          |
|--------------------------------------|------------------------------------------------------------------------------------------|
| <i>tccttagagcggccgcgtagatgctttaa</i> | primer for SHII operon downstream 1-kb flanking region, with NotI site and 8 extra bases |
| cattatgcacatcacctacaaga              | sequencing primer for SHII operon deletion                                               |
| agaaatccaagggagtccttgaa              | sequencing primer for SHII operon deletion                                               |
| ctccctcacagccttactaggatt             | confirmation/sequencing primer for SHII operon deletion                                  |
| aagcagttacggcaatccacgata             | confirmation/sequencing primer for SHII operon deletion                                  |
| <b>RT-qPCR</b>                       |                                                                                          |
| cgttgtgtgtgctagatcc                  | forward primer for qPCR of PF0971 ( <i>por</i> )                                         |
| gatggcttctctatgctctc                 | reverse primer for qPCR of PF0971 ( <i>por</i> )                                         |
| tcaaaaccagaatacagggagg               | forward primer for qPCR of PF0891 ( <i>shIIβ</i> )                                       |
| ccttctctctcaccttg                    | reverse primer for qPCR of PF0891 ( <i>shIIβ</i> )                                       |
| cagttgtccagctgacgat                  | forward primer for qPCR of PF0892 ( <i>shIIγ</i> )                                       |
| caggcttagtctatggacaac                | reverse primer for qPCR of PF0892 ( <i>shIIγ</i> )                                       |
| ggaagcgttcaactgagga                  | forward primer for qPCR of PF0893 ( <i>shIIδ</i> )                                       |
| cttcagagctcttctaattggc               | reverse primer for qPCR of PF0893 ( <i>shIIδ</i> )                                       |
| tgagcagtacagcgaagtg                  | forward primer for qPCR of PF0894 ( <i>shIIα</i> )                                       |
| ccgtataggaggtcagcattg                | reverse primer for qPCR of PF0894 ( <i>shIIα</i> )                                       |
| cataaggccaagggatgctatg               | forward primer for qPCR of PF1329 ( <i>shIIIβ</i> )                                      |
| ctccttcttctgtagtatgggtc              | reverse primer for qPCR of PF1329 ( <i>shIIIβ</i> )                                      |
| ccaatacagcttgcacagaag                | forward primer for qPCR of PF1330 ( <i>shIIIγ</i> )                                      |
| taacggagccattccaagtc                 | reverse primer for qPCR of PF1330 ( <i>shIIIγ</i> )                                      |
| ctggaactgtatcgacacagag               | forward primer for qPCR of PF1331 ( <i>shIIIδ</i> )                                      |
| ctcttctgtaagcctcttctgag              | reverse primer for qPCR of PF1331 ( <i>shIIIδ</i> )                                      |
| acggtgaggtaaggatgctag                | forward primer for qPCR of PF1332 ( <i>shIIIα</i> )                                      |
| caaggaggtagaggtggagtg                | reverse primer for qPCR of PF1332 ( <i>shIIIα</i> )                                      |
| gaaatactcgagctggagagg                | forward primer for qPCR of PF1113                                                        |
| caacggtaacctcaataggtcc               | reverse primer for qPCR of PF1113                                                        |
| gatctaaagctggcagacatc                | forward primer for qPCR of PF1114 ( <i>pyrF</i> )                                        |
| ccaggatggctcatctcaac                 | reverse primer for qPCR of PF1114 ( <i>pyrF</i> )                                        |
| gttgaggagttcgataagacc                | forward primer for qPCR of PF1115                                                        |
| cctcatccacaactactctcttg              | reverse primer for qPCR of PF1115                                                        |
| ttgaagatggctaaggagtgg                | forward primer for qPCR of PF1116                                                        |
| cggttctccaatcacaacatc                | reverse primer for qPCR of PF1116                                                        |

<sup>a</sup> Primer tails are indicated in italics.
